# Supplementary material for: Slow magnetic relaxation in dinuclear Co(iii)–Co(ii) complexes containing a five-coordinated Co(ii) centre with easy-axis anisotropy
Source: Royal Society of Chemistry journal article supplement (doi:10.1039/d2dt00857b), 2022-01-01
Supplement: d2dt00857b1.pdf [file d2dt00857b1.pdf]

## **Slow magnetic relaxation in dinuclear Co(III)-Co(II) complexes containing a five-coordinated Co(II) centre with easy-axis anisotropy**

Mengyao Liu,<sup>a</sup> Yimou Yang,<sup>a</sup> Rong Jing,<sup>a</sup> Shaojun Zheng,<sup>a</sup> Aihua Yuan,<sup>a</sup> Zhenxing Wang,<sup>\*b</sup> Shu-Chang Luo,<sup>\*c</sup> Xiangyu Liu,<sup>\*d</sup> Hui-Hui Cui,<sup>e</sup> Zhong-Wen Ouyang<sup>b</sup> and Lei Chen<sup>\*a</sup>

<sup>a</sup>School of Environmental and Chemical Engineering, Jiangsu University of Science and Technology, Zhenjiang 212003, P. R. China.

<sup>b</sup>Wuhan National High Magnetic Field Center & School of Physics, Huazhong University of Science and Technology, Wuhan 430074, P. R. China.

<sup>c</sup>School of Chemical Engineering, Guizhou University of Engineering Science, Bijie 551700, P. R. China.

<sup>d</sup>State Key Laboratory of High-efficiency Utilization of Coal and Green Chemical Engineering, National Demonstration Center for Experimental Chemistry Education, College of Chemistry and Chemical Engineering, Ningxia University, Yinchuan 750021, P. R. China.

<sup>e</sup>School of Chemistry and Chemical Engineering, Nantong University, Nantong 226019, P. R. China

## **Electronic Supplementary Information**

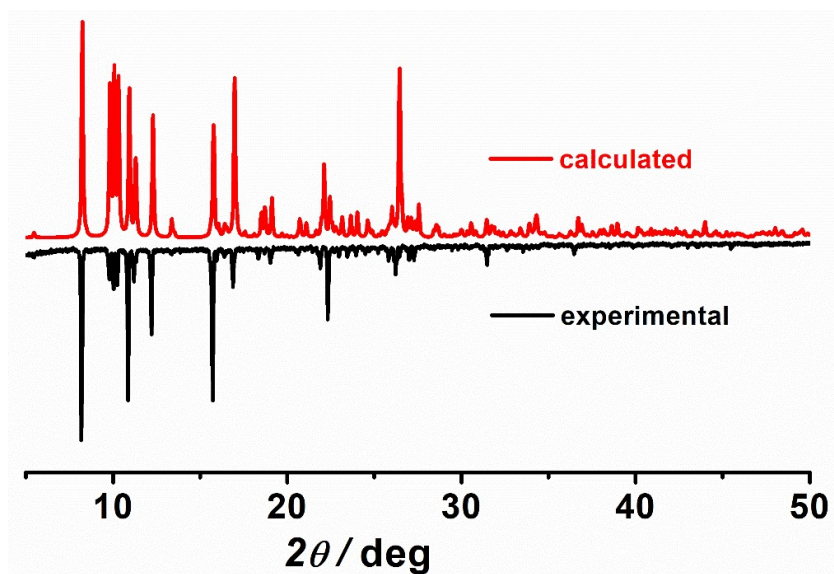

**Figure S1.** The powder X-ray diffraction pattern of **1** at room temperature.

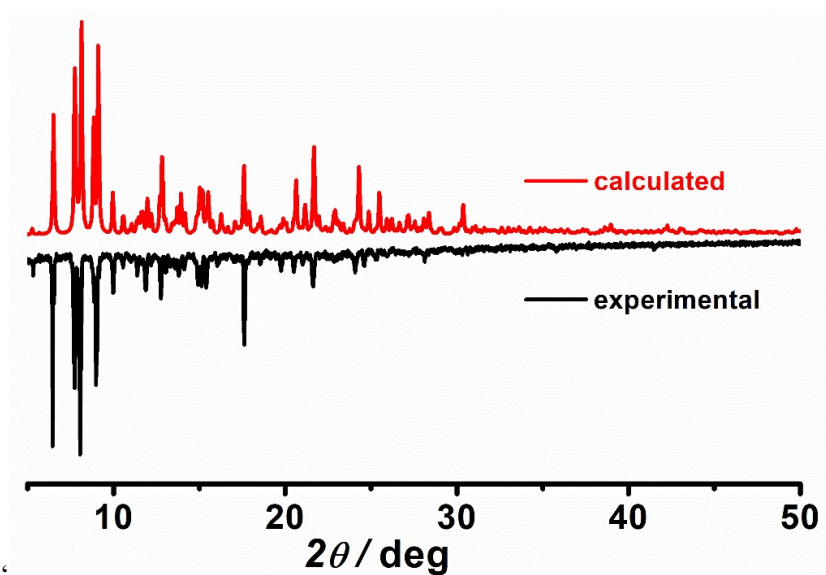

**Figure S2.** The powder X-ray diffraction pattern of **2** at room temperature.

**Table S1.** Crystal data and structure refinements for **1** and **2**.

|                                                                  | <b>1</b>                                                                       | <b>2</b>                                                                                        |
|------------------------------------------------------------------|--------------------------------------------------------------------------------|-------------------------------------------------------------------------------------------------|
| Molecular formula                                                | C <sub>37</sub> H <sub>53</sub> Co <sub>2</sub> N <sub>12</sub> O <sub>6</sub> | C <sub>85</sub> H <sub>108</sub> Cl <sub>2</sub> Co <sub>4</sub> N <sub>24</sub> O <sub>8</sub> |
| CCDC no                                                          | 2156157                                                                        | 2156158                                                                                         |
| Formula weight                                                   | 879.77                                                                         | 1900.57                                                                                         |
| Temperature / K                                                  | 173(2)                                                                         | 173(2)                                                                                          |
| Wavelength / Å                                                   | 0.71073                                                                        | 0.71073                                                                                         |
| crystal system                                                   | Triclinic                                                                      | Triclinic                                                                                       |
| Space group                                                      | <i>P</i> -1                                                                    | <i>P</i> -1                                                                                     |
| <i>a</i> / Å                                                     | 10.9935(17)                                                                    | 13.743(2)                                                                                       |
| <i>b</i> / Å                                                     | 11.9446(18)                                                                    | 18.029(3)                                                                                       |
| <i>c</i> / Å                                                     | 17.140(2)                                                                      | 20.727(3)                                                                                       |
| <i>α</i> / deg                                                   | 70.849(5)                                                                      | 69.604(5)                                                                                       |
| <i>β</i> / deg                                                   | 86.836(5)                                                                      | 84.300(5)                                                                                       |
| <i>γ</i> / deg                                                   | 71.907(5)                                                                      | 81.659(6)                                                                                       |
| <i>V</i> / Å <sup>3</sup>                                        | 2018.3(5)                                                                      | 4756.1(13)                                                                                      |
| <i>Z</i>                                                         | 2                                                                              | 2                                                                                               |
| <i>D</i> <sub>calc</sub> , g/cm <sup>3</sup>                     | 1.448                                                                          | 1.327                                                                                           |
| <i>μ</i> / mm <sup>-1</sup>                                      | 0.883                                                                          | 0.806                                                                                           |
| <i>F</i> (000)                                                   | 922                                                                            | 1984                                                                                            |
| Goodness-of-fit on <i>F</i> <sup>2</sup>                         | 0.978                                                                          | 1.066                                                                                           |
| Final <i>R</i> indices [ <i>I</i> > 2σ( <i>I</i> )] <sup>a</sup> | <i>R</i> <sub>1</sub> = 0.0737,<br><i>wR</i> <sub>2</sub> = 0.1837             | <i>R</i> <sub>1</sub> = 0.0859,<br><i>wR</i> <sub>2</sub> = 0.2391                              |
| <i>R</i> indices (all data) <sup>a</sup>                         | <i>R</i> <sub>1</sub> = 0.1063,<br><i>wR</i> <sub>2</sub> = 0.2069             | <i>R</i> <sub>1</sub> = 0.1435,<br><i>wR</i> <sub>2</sub> = 0.2672                              |

$$^a wR_2 = [\Sigma[w(F_o^2 - F_c^2)^2] / \Sigma[w(F_o^2)]]^{1/2}, R_1 = \Sigma||F_o| - |F_c|| / \Sigma|F_o|.$$

**Table S2.** Selected bond lengths (Å) and angles (deg) for **1**.

|                  | <b>Co(III)</b> | <b>Co(II)</b>   |            |
|------------------|----------------|-----------------|------------|
| Co(1)-N(1)       | 1.918(4)       | Co(2)-O(3)      | 1.974(3)   |
| Co(1)-N(2)       | 1.934(4)       | Co(2)-O(4)      | 2.637(3)   |
| Co(1)-N(3)       | 1.905(4)       | Co(2)-N(5)      | 2.008(4)   |
| Co(1)-N(4)       | 1.902(4)       | Co(2)-N(6)      | 2.005(4)   |
| Co(1)-N(9)       | 1.955(4)       | Co(2)-N(7)      | 2.024(5)   |
| Co(1)-N(11)      | 2.007(4)       |                 |            |
| N(1)-Co(1)-N(2)  | 96.69(16)      | N(6)-Co(2)-N(5) | 103.12(15) |
| N(3)-Co(1)-N(1)  | 81.98(16)      | N(5)-Co(2)-N(7) | 105.61(17) |
| N(3)-Co(1)-N(4)  | 99.28(16)      | N(6)-Co(2)-N(7) | 103.98(17) |
| N(4)-Co(1)-N(2)  | 82.04(16)      | O(3)-Co(2)-N(5) | 124.94(15) |
| N(9)-Co(1)-N(11) | 177.75(15)     | O(3)-Co(2)-N(6) | 116.82(15) |
|                  |                | O(3)-Co(2)-N(7) | 99.95(16)  |

**Table S3.** Selected bond lengths (Å) and angles (deg) for **2**.

| Co(III)         |          |                   |          | Co(II)           |          |                   |           |
|-----------------|----------|-------------------|----------|------------------|----------|-------------------|-----------|
| Co(1)-N(1)      | 1.908(5) | Co(3)-N(13)       | 1.916(5) | Co(2)-O(3)       | 1.956(5) | Co(4)-O(7)        | 1.946 (8) |
| Co(1)-N(2)      | 1.927(4) | Co(3)-N(14)       | 1.926(5) | Co(2)-O(4)       | 2.581(9) | Co(4)-O(8)        | 2.692(13) |
| Co(1)-N(3)      | 1.916(5) | Co(3)-N(15)       | 1.906(5) | Co(2)-N(4)       | 2.016(5) | Co(4)-N(16)       | 1.973(6)  |
| Co(1)-N(5)      | 1.903(5) | Co(3)-N(17)       | 1.916(5) | Co(2)-N(6)       | 2.021(5) | Co(4)-N(18)       | 2.015(6)  |
| Co(1)-N(7)      | 1.969(5) | Co(3)-N(19)       | 1.971(5) | Co(2)-N(11)      | 2.014(5) | Co(4)-N(23)       | 2.034(6)  |
| Co(1)-N(9)      | 1.985(5) | Co(3)-N(21)       | 2.016(5) |                  |          |                   |           |
| N(1)-Co(1)-N(2) | 95.8(2)  | N(13)-Co(3)-N(14) | 96.5(2)  | N(11)-Co(2)-N(4) | 105.6(2) | N(16)-Co(4)-N(18) | 103.9(4)  |
| N(1)-Co(1)-N(3) | 81.9(2)  | N(15)-Co(3)-N(13) | 81.5(2)  | N(11)-Co(2)-N(6) | 105.7(2) | N(16)-Co(4)-N(23) | 102.9(4)  |
| N(5)-Co(1)-N(3) | 100.3(2) | N(15)-Co(3)-N(17) | 99.4(2)  | N(4)-Co(2)-N(6)  | 104.0(2) | N(18)-Co(4)-N(23) | 107.7(4)  |
| N(5)-Co(1)-N(2) | 81.9(2)  | N(17)-Co(3)-N(14) | 82.7(2)  | O(3)-Co(2)-N(4)  | 117.3(2) | O(7)-Co(4)-N(16)  | 119.6(5)  |
| N(7)-Co(1)-N(9) | 178.9(2) | N(19)-Co(3)-N(21) | 178.9(2) | O(3)-Co(2)-N(6)  | 123.6(2) | O(7)-Co(4)-N(18)  | 119.3(5)  |
|                 |          |                   |          | O(3)-Co(2)-N(11) | 98.6(2)  | O(7)-Co(4)-N(23)  | 101.8(3)  |

**Table S4.** Continuous shape measure (CShM) analyses for **1** and **2**. The lowest CShM value is highlighted.

| Ideal Polyhedron                            | <b>1</b> |        | <b>2</b> |        |
|---------------------------------------------|----------|--------|----------|--------|
|                                             | Co2      | Co2    | Co2      | Co4    |
| Pentagon ( $D_{5h}$ )                       | 30.047   | 30.542 | 30.542   | 30.409 |
| Vacant octahedron ( $C_{4v}$ )              | 7.261    | 6.868  | 6.868    | 7.763  |
| Trigonal bipyramid ( $D_{3h}$ )             | 4.951    | 4.566  | 4.566    | 5.749  |
| Spherical square pyramid ( $C_{4v}$ )       | 6.004    | 5.256  | 5.256    | 5.697  |
| Johnson trigonal bipyramid J12 ( $D_{3h}$ ) | 5.124    | 5.013  | 5.013    | 5.542  |

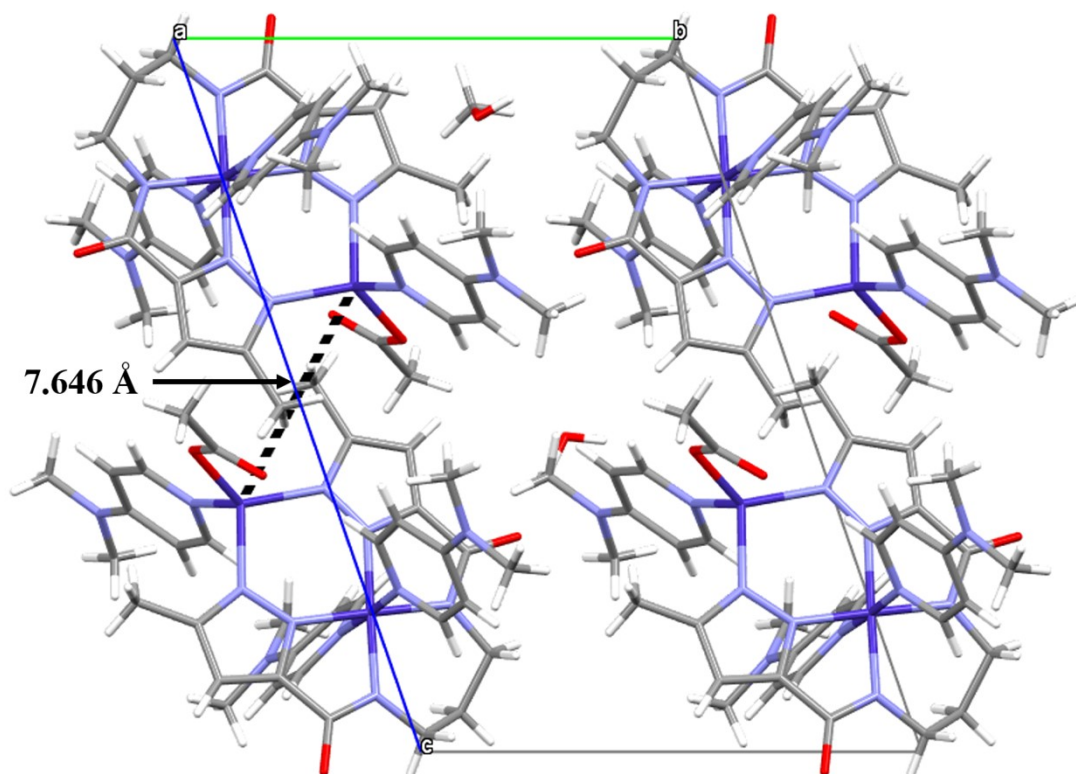

**Figure S3.** The packing diagram for complex **1** gives the shortest Co(II)···Co(II) distance of 7.646 Å.

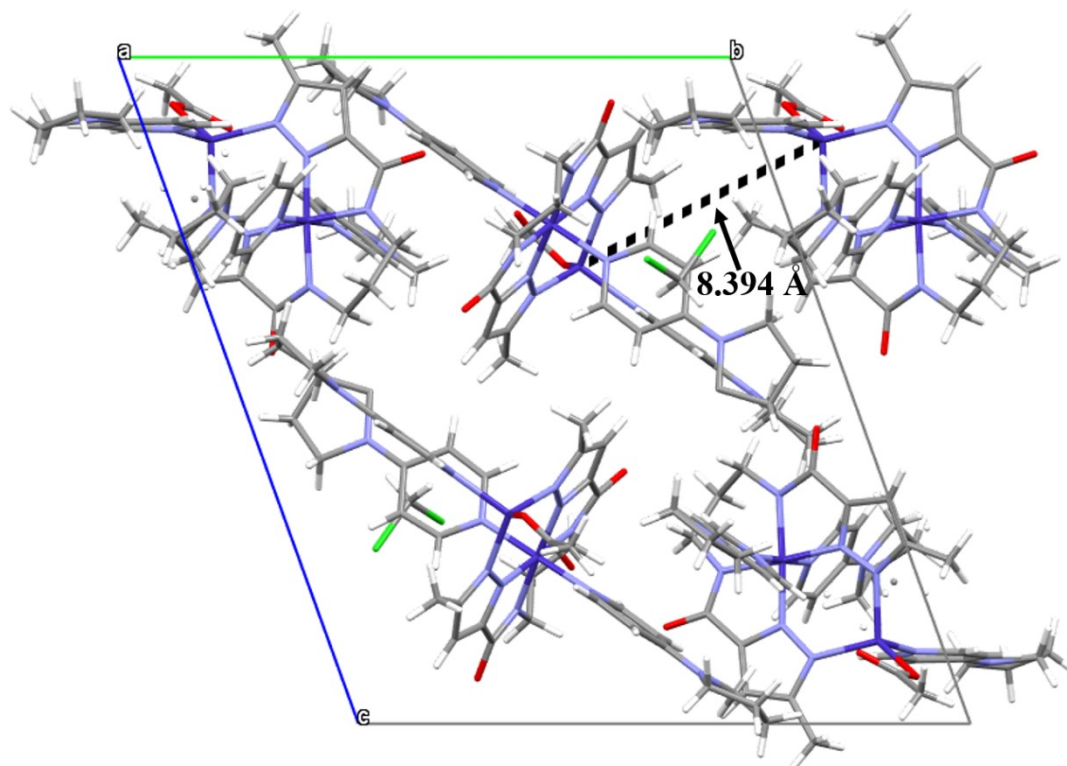

**Figure S4.** The packing diagram for complex **2** gives the shortest Co(II)···Co(II) distance of 8.394 Å.

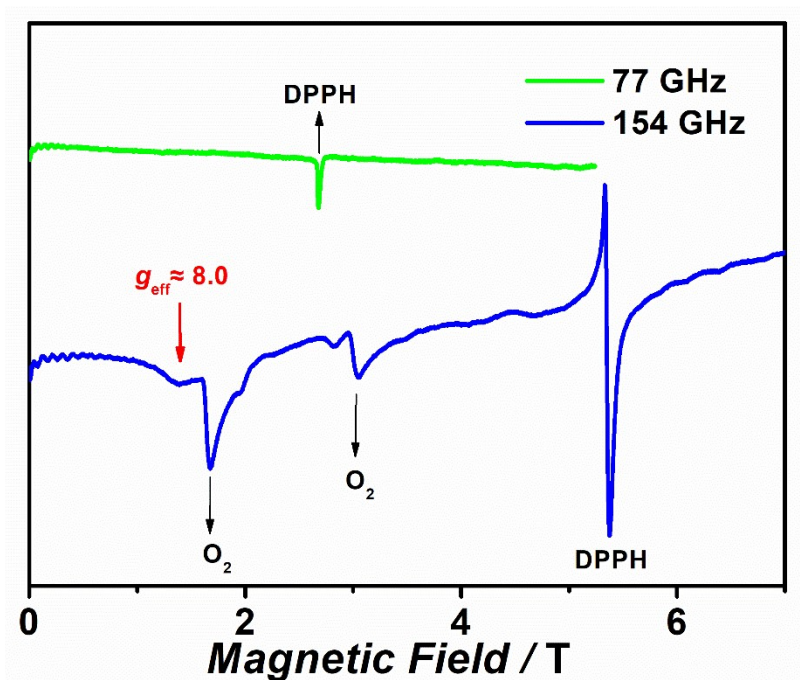

Figure S5. The HFEPR spectra of **1** at 2 K.

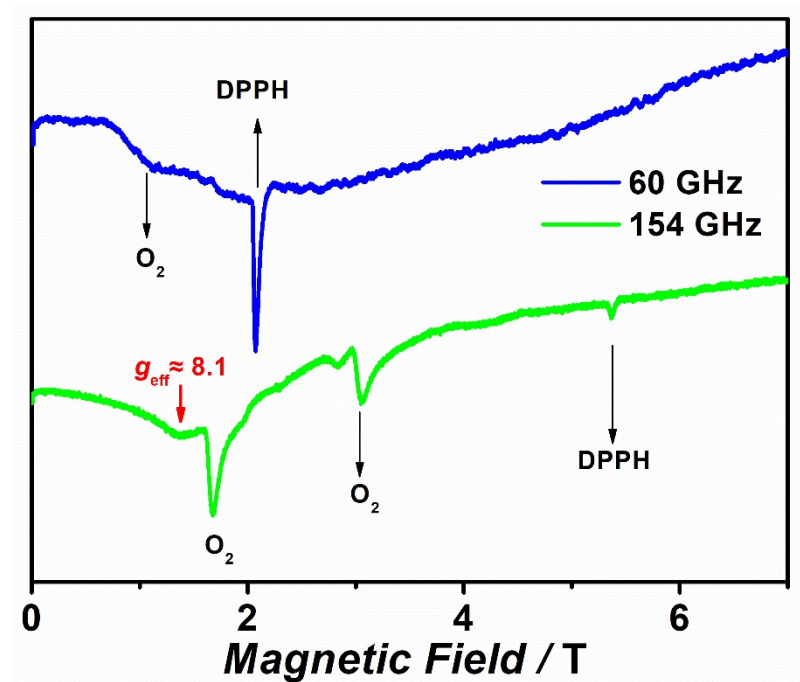

Figure S6. The HFEPR spectra of **2** at 2 K.

**Table S5.** Calculated values of  $D$ ,  $E$ , and  $g$  for **1** and **2** using ORCA/CASSCF+NEVPT2.

| Complex      | $D$ (cm <sup>-1</sup> ) | $E$ (cm <sup>-1</sup> ) | $g_{\text{iso}}$ | $g_x$  | $g_y$  | $g_z$  |
|--------------|-------------------------|-------------------------|------------------|--------|--------|--------|
| <b>1</b>     | -24.64                  | -0.72                   | 2.2607           | 2.1536 | 2.1722 | 2.4564 |
| <b>2-Co2</b> | -20.37                  | -0.62                   | 2.2498           | 2.1588 | 2.1766 | 2.4139 |
| <b>2-Co4</b> | -15.70                  | -1.90                   | 2.2485           | 2.1610 | 2.2088 | 2.3757 |

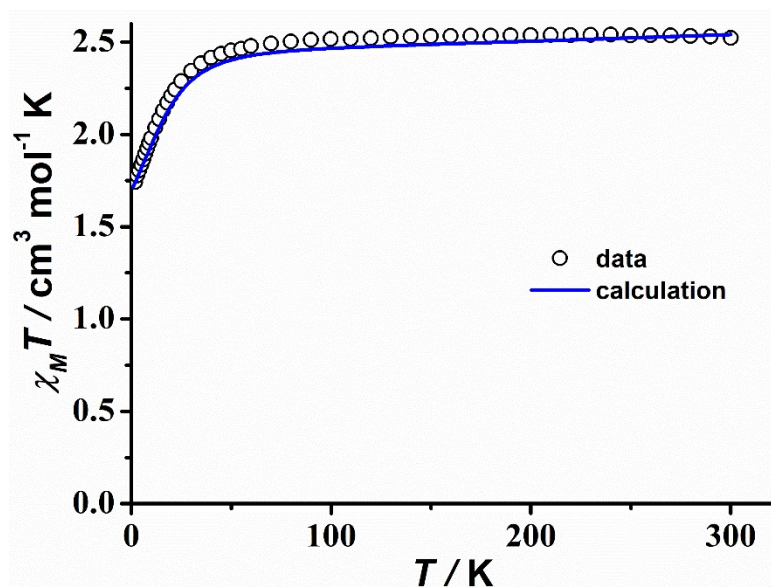

**Figure S7.** The theoretical (solid line) curves of magnetic susceptibilities of **1**.

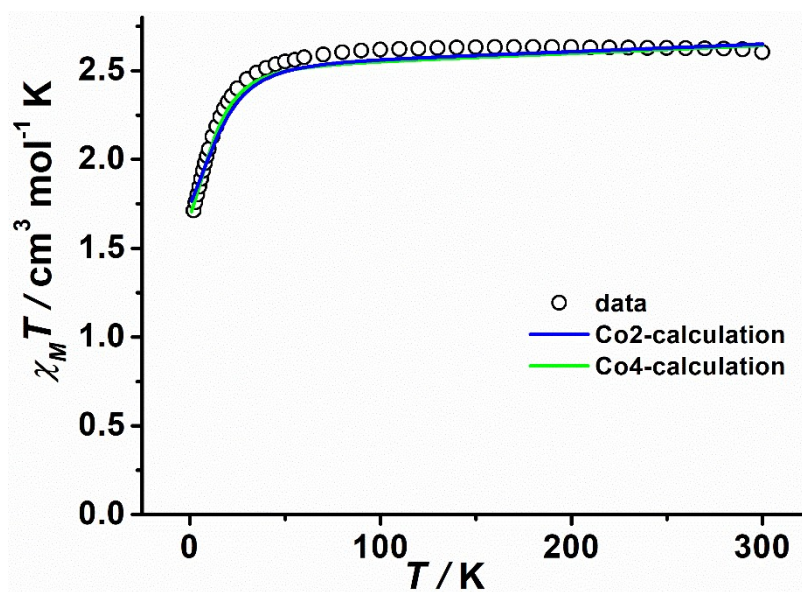

**Figure S8.** The theoretical (solid line) curves of magnetic susceptibilities of **2**.

**Table S6.** Calculated energy levels ( $\text{cm}^{-1}$ ) and  $\mathbf{g}$  ( $g_x$ ,  $g_y$ ,  $g_z$ ) tensors of the lowest Kramers doublets (KDs) of the  $\text{Co}^{\text{II}}$  for **1** and **2** using ORCA/CASSCF+NEVPT2+SINGLE\_ANISO.

| <b>1</b> |                    |        |        |        | <b>2-Co2</b> |                    |        |        |        |
|----------|--------------------|--------|--------|--------|--------------|--------------------|--------|--------|--------|
| KDs      | $E/\text{cm}^{-1}$ | $g_x$  | $g_y$  | $g_z$  | KDs          | $E/\text{cm}^{-1}$ | $g_x$  | $g_y$  | $g_z$  |
| 1        | 0.000              | 0.1866 | 0.1934 | 7.3444 | 1            | 0.000              | 0.1941 | 0.1980 | 7.2196 |
| 2        | 49.337             | 4.4860 | 4.1431 | 2.4749 | 2            | 40.797             | 4.5030 | 4.1455 | 2.4260 |
| 3        | 2522.007           | 4.6964 | 4.0604 | 1.5253 | 3            | 2823.737           | 4.5871 | 4.1819 | 1.5733 |
| 4        | 2642.787           | 0.2592 | 0.2753 | 4.6923 | 4            | 2937.620           | 0.1615 | 0.1788 | 4.8037 |

  

| <b>2-Co4</b> |                    |        |        |        |
|--------------|--------------------|--------|--------|--------|
| KDs          | $E/\text{cm}^{-1}$ | $g_x$  | $g_y$  | $g_z$  |
| 1            | 0.000              | 0.7233 | 0.8273 | 7.0115 |
| 2            | 32.077             | 2.2884 | 3.5794 | 5.0365 |
| 3            | 3003.018           | 5.2138 | 3.6091 | 1.5857 |
| 4            | 3111.435           | 0.6715 | 0.7226 | 4.9337 |

**Table S7.** Individual contributions to  $D$ -tensor for **1** and **2** calculated using CASSCF/NEVPT2/ZORA-def2-TZVP(-f).

| <b>1</b> |      |         |        | <b>2-Co2</b> |        | <b>2-Co4</b> |        |
|----------|------|---------|--------|--------------|--------|--------------|--------|
| $2S+1$   | Root | $D$     | $E$    | $D$          | $E$    | $D$          | $E$    |
| 4        | 0    | 0.000   | 0.000  | 0.000        | 0.000  | 0.000        | 0.000  |
| 4        | 1    | -39.537 | 0.046  | -36.465      | 0.008  | -31.358      | -0.326 |
| 4        | 2    | 5.451   | -6.004 | 7.300        | -7.372 | 7.137        | -7.790 |
| 4        | 3    | 5.244   | 6.538  | 5.747        | 5.611  | 4.024        | 2.544  |
| 4        | 4    | 2.922   | -1.266 | 1.669        | 0.966  | 3.726        | 3.382  |
| 4        | 5    | -0.283  | -0.013 | -0.212       | 0.002  | -0.381       | -0.037 |
| 4        | 6    | 0.111   | -0.072 | 0.122        | 0.016  | 0.112        | 0.023  |
| 4        | 7    | 0.016   | -0.011 | 0.012        | 0.000  | 0.018        | -0.003 |
| 4        | 8    | 0.001   | -0.001 | 0.001        | 0.000  | -0.001       | -0.000 |
| 4        | 9    | -0.019  | -0.000 | -0.015       | 0.000  | -0.025       | 0.001  |
| 2        | 0    | -0.433  | 0.763  | -0.491       | 0.561  | -0.444       | 0.322  |
| 2        | 1    | 0.131   | -0.555 | 0.161        | -0.399 | 0.250        | -0.259 |
| 2        | 2    | 0.388   | -0.022 | 0.445        | -0.012 | 0.494        | -0.013 |
| 2        | 3    | 0.103   | -0.001 | 0.025        | 0.002  | 0.023        | -0.001 |
| 2        | 4    | -0.005  | 0.007  | 0.044        | 0.004  | 0.038        | -0.000 |
| 2        | 5    | 0.142   | -0.010 | 0.047        | 0.017  | 0.121        | 0.006  |
| 2        | 6    | 4.349   | -0.027 | 4.919        | -0.030 | 4.412        | 0.041  |
| 2        | 7    | -1.714  | 1.582  | -1.924       | 0.417  | -1.830       | 1.033  |
| 2        | 8    | -2.232  | -2.043 | -2.261       | -0.395 | -2.301       | -0.997 |
| 2        | 9    | -0.258  | 0.368  | -0.275       | 0.063  | -0.258       | 0.081  |
| 2        | 10   | 0.685   | -0.005 | 0.659        | -0.021 | 0.385        | 0.044  |
| 2        | 11   | 0.104   | 0.013  | 0.218        | -0.028 | 0.236        | -0.034 |



|   |    |        |        |        |        |        |        |
|---|----|--------|--------|--------|--------|--------|--------|
| 2 | 12 | 0.317  | 0.003  | 0.181  | -0.000 | 0.413  | -0.010 |
| 2 | 13 | -0.067 | 0.025  | -0.015 | 0.005  | -0.104 | 0.080  |
| 2 | 14 | -0.085 | -0.047 | -0.094 | -0.056 | -0.059 | -0.051 |
| 2 | 15 | 0.002  | -0.008 | -0.122 | 0.062  | -0.041 | 0.039  |
| 2 | 16 | -0.253 | 0.193  | -0.112 | 0.055  | -0.236 | 0.081  |
| 2 | 17 | 0.142  | -0.001 | 0.101  | 0.000  | -0.002 | 0.018  |
| 2 | 18 | -0.014 | -0.017 | 0.038  | -0.002 | 0.119  | -0.016 |
| 2 | 19 | 0.049  | -0.023 | -0.014 | -0.012 | 0.055  | -0.010 |
| 2 | 20 | 0.010  | -0.002 | 0.003  | -0.006 | -0.051 | -0.034 |
| 2 | 21 | -0.006 | -0.027 | 0.021  | -0.004 | 0.080  | -0.004 |
| 2 | 22 | -0.741 | 0.698  | -0.754 | -0.382 | -0.793 | -0.767 |
| 2 | 23 | -0.687 | -0.660 | -0.634 | 0.282  | -0.406 | 0.397  |
| 2 | 24 | -0.014 | 0.011  | -0.026 | 0.004  | -0.076 | 0.092  |
| 2 | 25 | 0.350  | -0.005 | 0.352  | -0.007 | 0.418  | 0.010  |
| 2 | 26 | -0.002 | -0.002 | -0.001 | -0.000 | -0.001 | 0.002  |
| 2 | 27 | -0.006 | 0.002  | -0.003 | 0.000  | -0.003 | -0.004 |
| 2 | 28 | -0.007 | 0.005  | -0.003 | 0.002  | -0.006 | 0.002  |
| 2 | 29 | 0.304  | 0.001  | 0.301  | -0.002 | 0.260  | 0.019  |
| 2 | 30 | -0.093 | 0.091  | -0.104 | 0.089  | -0.055 | 0.019  |
| 2 | 31 | -0.089 | -0.087 | -0.097 | -0.078 | -0.096 | -0.024 |
| 2 | 32 | -0.010 | -0.008 | -0.007 | -0.002 | -0.010 | -0.008 |
| 2 | 33 | -0.011 | 0.013  | -0.009 | 0.005  | -0.012 | 0.006  |
| 2 | 34 | 0.000  | 0.001  | 0.000  | -0.000 | -0.000 | -0.000 |
| 2 | 35 | -0.000 | -0.001 | 0.000  | -0.000 | 0.000  | 0.000  |
| 2 | 36 | -0.015 | -0.015 | -0.014 | -0.014 | -0.016 | -0.004 |
| 2 | 37 | -0.007 | 0.008  | -0.005 | 0.005  | -0.006 | -0.002 |
| 2 | 38 | -0.008 | 0.003  | -0.014 | 0.007  | -0.016 | 0.008  |
| 2 | 39 | 0.027  | 0.006  | 0.035  | 0.004  | 0.037  | -0.002 |

**Table S8.** Energy levels ( $\text{cm}^{-1}$ ) of ligand field multiplets for **1** and **2** calculated using CASSCF/ZORA-def2-TZVP(-f) in magnetic zero field.

|               | <b>1</b>                                           | <b>2-Co2</b>                                       | <b>2-Co4</b>                                       |
|---------------|----------------------------------------------------|----------------------------------------------------|----------------------------------------------------|
| <b>States</b> | <b>Energy levels (<math>\text{cm}^{-1}</math>)</b> | <b>Energy levels (<math>\text{cm}^{-1}</math>)</b> | <b>Energy levels (<math>\text{cm}^{-1}</math>)</b> |
| 1             | 0.0                                                | 0.0                                                | 0.0                                                |
| 2             | 49.3                                               | 40.8                                               | 32.1                                               |
| 3             | 49.3                                               | 40.8                                               | 32.1                                               |
| 4             | 2522.0                                             | 2823.7                                             | 3003.0                                             |
| 5             | 2522.0                                             | 2823.7                                             | 3003.0                                             |
| 6             | 2642.8                                             | 2937.6                                             | 3111.4                                             |
| 7             | 2642.8                                             | 2937.6                                             | 3111.4                                             |
| 8             | 6136.7                                             | 6347.9                                             | 5512.0                                             |
| 9             | 6136.7                                             | 6347.9                                             | 5512.0                                             |
| 10            | 6293.0                                             | 6516.0                                             | 5652.6                                             |
| 11            | 6293.0                                             | 6516.0                                             | 5652.6                                             |

|    |         |         |         |
|----|---------|---------|---------|
| 12 | 7281.2  | 7165.5  | 6818.3  |
| 13 | 7281.2  | 7165.5  | 6818.3  |
| 14 | 7375.1  | 7291.7  | 6955.8  |
| 15 | 7375.1  | 7291.7  | 6955.8  |
| 16 | 7964.3  | 8245.5  | 7941.1  |
| 17 | 7964.3  | 8245.5  | 7941.1  |
| 18 | 8052.6  | 8343.3  | 8034.2  |
| 19 | 8052.6  | 8343.3  | 8034.2  |
| 20 | 9553.8  | 9548.2  | 9717.7  |
| 21 | 9553.8  | 9548.2  | 9717.7  |
| 22 | 9665.7  | 9671.2  | 9833.3  |
| 23 | 9665.7  | 9671.2  | 9833.3  |
| 24 | 13158.8 | 12724.5 | 12919.5 |
| 25 | 13158.8 | 12724.5 | 12919.5 |
| 26 | 13180.0 | 12750.2 | 12947.9 |
| 27 | 13180.0 | 12750.2 | 12947.9 |
| 28 | 15991.0 | 16474.4 | 15852.4 |
| 29 | 15991.0 | 16474.4 | 15852.4 |
| 30 | 16825.1 | 17222.0 | 17176.5 |
| 31 | 16825.1 | 17222.0 | 17176.5 |
| 32 | 18584.8 | 18658.7 | 18413.3 |
| 33 | 18584.8 | 18658.7 | 18413.3 |
| 34 | 18883.8 | 18893.7 | 18813.6 |
| 35 | 18883.8 | 18893.7 | 18813.6 |
| 36 | 19577.0 | 19410.3 | 19571.5 |
| 37 | 19577.0 | 19410.3 | 19571.5 |
| 38 | 20472.5 | 20632.0 | 20659.6 |
| 39 | 20472.5 | 20632.0 | 20659.6 |
| 40 | 20788.8 | 21067.5 | 20908.8 |
| 41 | 20788.8 | 21067.5 | 20908.8 |
| 42 | 20837.7 | 21121.5 | 20955.5 |
| 43 | 20837.7 | 21121.5 | 20955.5 |
| 44 | 21150.6 | 21298.1 | 21192.4 |
| 45 | 21150.6 | 21298.1 | 21192.4 |
| 46 | 21718.9 | 21491.1 | 21292.1 |
| 47 | 21718.9 | 21491.1 | 21292.1 |
| 48 | 21810.0 | 21612.1 | 21389.4 |
| 49 | 21810.0 | 21612.1 | 21389.4 |
| 50 | 22398.8 | 22253.8 | 22409.6 |
| 51 | 22398.8 | 22253.8 | 22409.6 |
| 52 | 22595.8 | 22436.0 | 22576.6 |
| 53 | 22595.8 | 22436.0 | 22576.6 |
| 54 | 22907.1 | 23210.1 | 22752.8 |
| 55 | 22907.1 | 23210.1 | 22752.8 |

|    |         |         |         |
|----|---------|---------|---------|
| 56 | 23819.6 | 23930.4 | 23879.4 |
| 57 | 23819.6 | 23930.4 | 23879.4 |
| 58 | 24230.6 | 24235.0 | 23997.9 |
| 59 | 24230.6 | 24235.0 | 23997.9 |
| 60 | 24615.2 | 24662.6 | 24513.4 |
| 61 | 24615.2 | 24662.6 | 24513.4 |
| 62 | 25134.8 | 25272.8 | 25005.0 |
| 63 | 25134.8 | 25272.8 | 25005.0 |
| 64 | 26603.1 | 26516.8 | 26206.9 |
| 65 | 26603.1 | 26516.8 | 26206.9 |
| 66 | 26917.9 | 26706.0 | 26732.9 |
| 67 | 26917.9 | 26706.0 | 26732.9 |
| 68 | 27281.4 | 27157.9 | 27578.0 |
| 69 | 27281.4 | 27157.9 | 27578.0 |
| 70 | 28017.9 | 27839.4 | 27912.7 |
| 71 | 28017.9 | 27839.4 | 27912.7 |
| 72 | 28214.1 | 28229.1 | 28162.1 |
| 73 | 28214.1 | 28229.1 | 28162.1 |
| 74 | 29390.2 | 29357.2 | 29584.7 |
| 75 | 29390.2 | 29357.2 | 29584.7 |
| 76 | 29886.1 | 29638.8 | 29876.0 |
| 77 | 29886.1 | 29638.8 | 29876.0 |
| 78 | 30496.0 | 30512.5 | 30129.3 |
| 79 | 30496.0 | 30512.5 | 30129.3 |
| 80 | 31010.0 | 30823.9 | 30829.0 |
| 81 | 31010.0 | 30823.9 | 30829.0 |
| 82 | 31239.3 | 31154.9 | 31054.4 |
| 83 | 31239.3 | 31154.9 | 31054.4 |
| 84 | 31442.3 | 31401.8 | 31485.8 |
| 85 | 31442.3 | 31401.8 | 31485.8 |
| 86 | 32048.7 | 31936.6 | 32269.5 |
| 87 | 32048.7 | 31936.6 | 32269.5 |
| 88 | 33992.5 | 33786.9 | 33443.3 |
| 89 | 33992.5 | 33786.9 | 33443.3 |
| 90 | 34774.5 | 34636.1 | 33865.4 |
| 91 | 34774.5 | 34636.1 | 33865.4 |
| 92 | 35409.7 | 35459.4 | 35426.4 |
| 93 | 35409.7 | 35459.4 | 35426.4 |
| 94 | 36585.2 | 36685.2 | 36156.7 |
| 95 | 36585.2 | 36685.2 | 36156.7 |
| 96 | 41060.2 | 40942.4 | 41016.7 |
| 97 | 41060.2 | 40942.4 | 41016.7 |
| 98 | 41521.9 | 41427.5 | 41377.5 |
| 99 | 41521.9 | 41427.5 | 41377.5 |

|     |         |         |         |
|-----|---------|---------|---------|
| 100 | 42177.5 | 42043.4 | 42007.1 |
| 101 | 42177.5 | 42043.4 | 42007.1 |
| 102 | 42678.8 | 42576.6 | 42571.6 |
| 103 | 42678.8 | 42576.6 | 42571.6 |
| 104 | 43331.1 | 43363.0 | 43284.2 |
| 105 | 43331.1 | 43363.0 | 43284.2 |
| 106 | 43716.6 | 43660.3 | 43723.1 |
| 107 | 43716.6 | 43660.3 | 43723.1 |
| 108 | 44683.4 | 44597.7 | 44343.7 |
| 109 | 44683.4 | 44597.7 | 44343.7 |
| 110 | 61163.3 | 61006.6 | 60999.7 |
| 111 | 61163.3 | 61006.6 | 60999.7 |
| 112 | 62749.1 | 62737.3 | 62600.0 |
| 113 | 62749.1 | 62737.3 | 62600.0 |
| 114 | 63128.3 | 63014.2 | 63077.5 |
| 115 | 63128.3 | 63014.2 | 63077.5 |
| 116 | 63987.8 | 63808.6 | 63583.6 |
| 117 | 63987.8 | 63808.6 | 63583.6 |
| 118 | 64505.1 | 64221.9 | 64463.5 |
| 119 | 64505.1 | 64221.9 | 64463.5 |

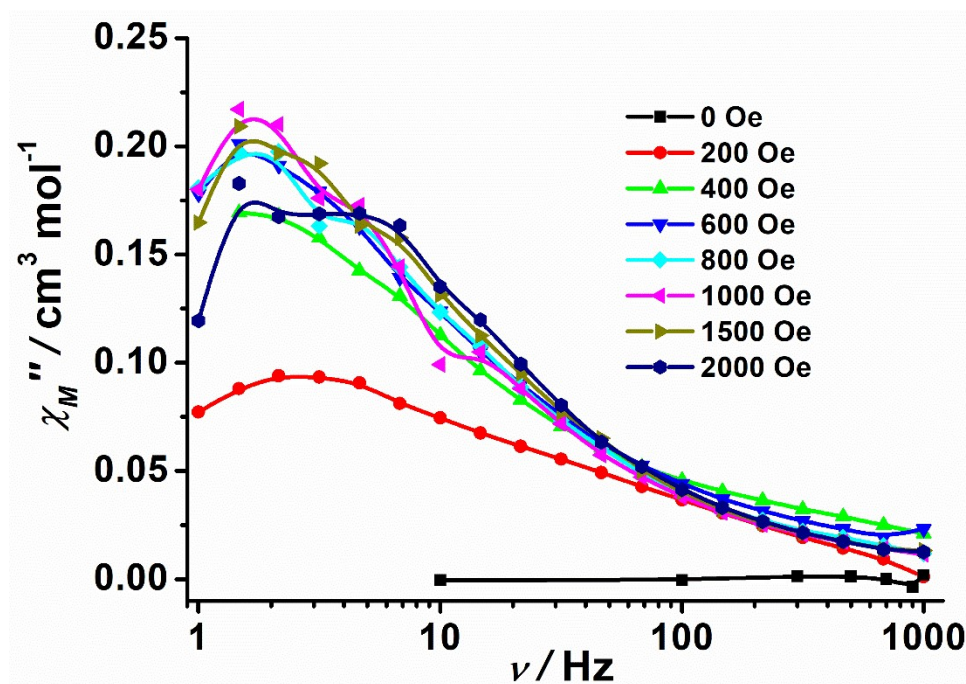

**Figure S9.** Frequency dependence of out-of-phase ( $\chi_M''$ ) ac susceptibility at 2.0 K under the different applied fields from 0 to 2000 Oe for **1**. The solid lines are for eye guide.

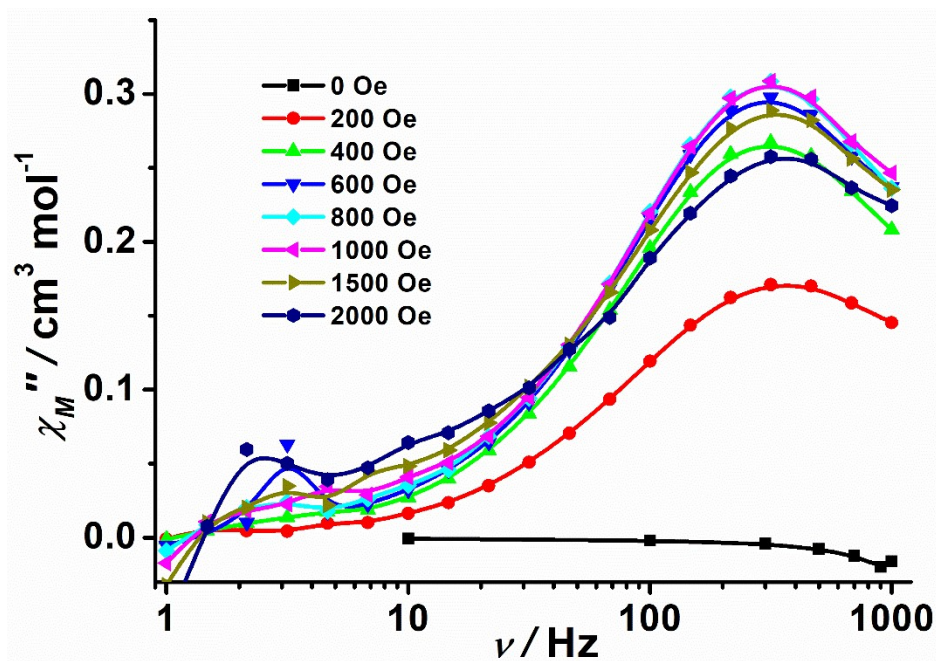

**Figure S10.** Frequency dependence of out-of-phase ( $\chi_M''$ ) ac susceptibility at 2.0 K under the different applied fields from 0 to 2000 Oe for **2**. The solid lines are for eye guide.

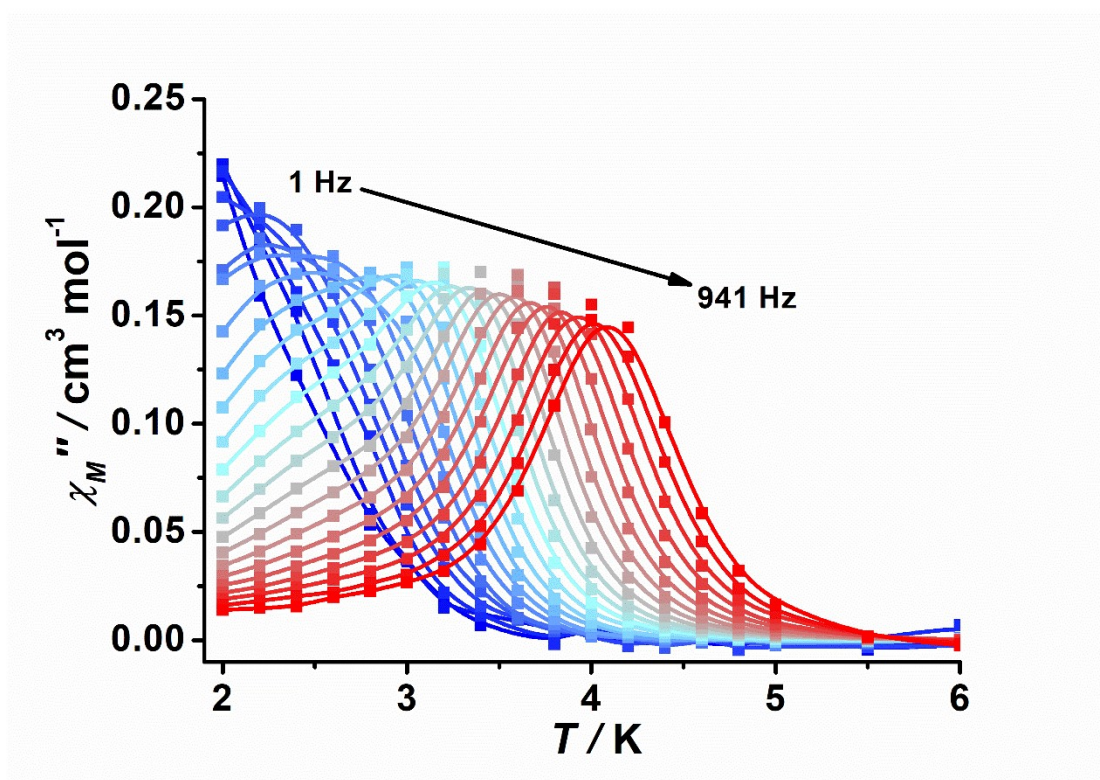

**Figure S11.** Temperature dependence of out-of-phase ( $\chi_M''$ ) ac susceptibility under the 1000 Oe applied field for **1**. The solid lines are for eye guide.

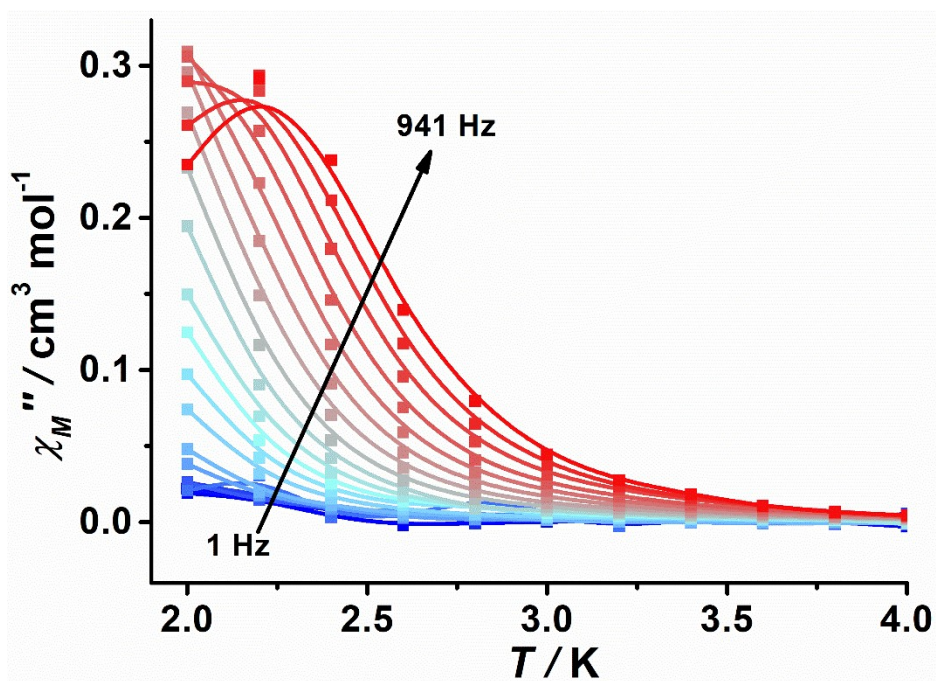

**Figure S12.** Temperature dependence of out-of-phase ( $\chi_M''$ ) ac susceptibility under the 1000 Oe applied field for **2**. The solid lines are for eye guide.

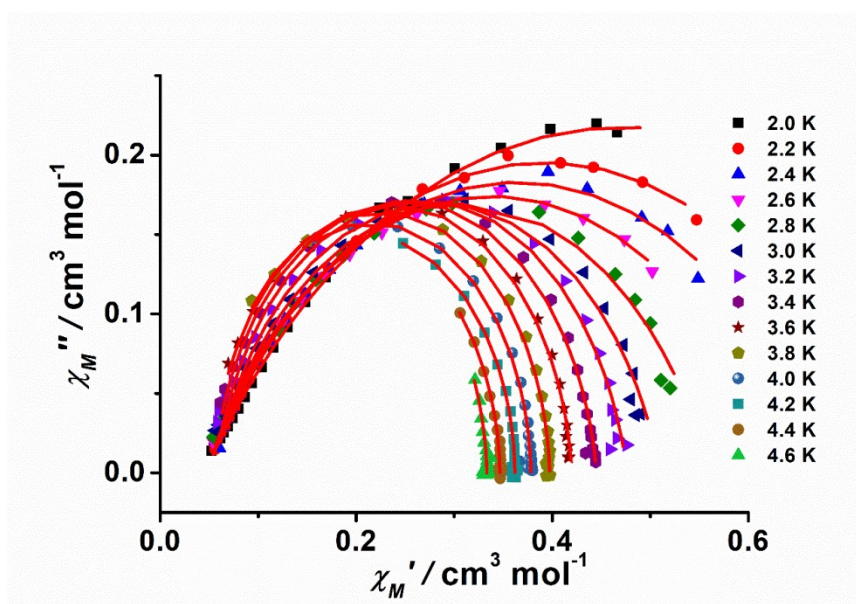

**Figure S13.** Cole-Cole plot obtained from the ac susceptibility data under the 1000 Oe applied field in the temperature range of 2.0-4.6 K for **1**.

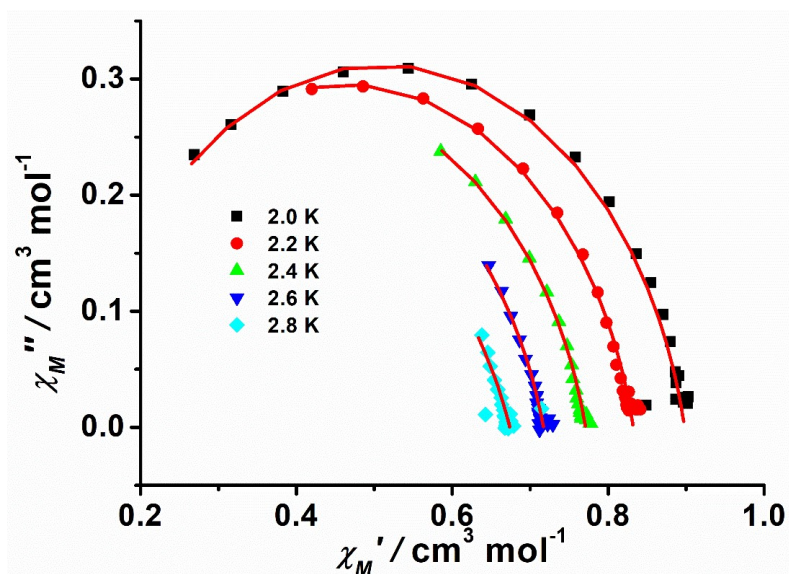

**Figure S14.** Cole-Cole plot obtained from the ac susceptibility data under the 1000 Oe applied field in the temperature range of 2.0-2.8 K for **2**.

**Table S9.** The parameters obtained by fitting Cole-Cole plot under the 1000 Oe applied field for **1**.

| T / K | $\chi_s$ | $\chi_T$ | $\tau$   | $a$  |
|-------|----------|----------|----------|------|
| 2.0   | 0.045    | 0.90     | 0.14     | 0.40 |
| 2.2   | 0.047    | 0.74     | 0.057    | 0.34 |
| 2.4   | 0.046    | 0.68     | 0.035    | 0.34 |
| 2.6   | 0.046    | 0.63     | 0.022    | 0.32 |
| 2.8   | 0.051    | 0.56     | 0.013    | 0.25 |
| 3.0   | 0.055    | 0.51     | 0.0075   | 0.18 |
| 3.2   | 0.055    | 0.48     | 0.0041   | 0.13 |
| 3.4   | 0.054    | 0.44     | 0.0021   | 0.08 |
| 3.6   | 0.053    | 0.42     | 0.0010   | 0.05 |
| 3.8   | 0.053    | 0.40     | 0.00050  | 0.09 |
| 4.0   | 0.055    | 0.38     | 0.00025  | 0.02 |
| 4.2   | 0.058    | 0.36     | 0.00013  | 0.01 |
| 4.4   | 0.036    | 0.35     | 0.000063 | 0.02 |
| 4.6   | 0        | 0.33     | 0.000030 | 0.02 |

**Table S10.** The parameters obtained by fitting Cole-Cole plot under the 1000 Oe applied field for **2**.

| T / K | $\chi_s$ | $\chi_T$ | $\tau$   | $a$  |
|-------|----------|----------|----------|------|
| 2.0   | 0.12     | 0.90     | 0.00049  | 0.14 |
| 2.2   | 0.097    | 0.83     | 0.00020  | 0.14 |
| 2.4   | 0.047    | 0.77     | 0.000076 | 0.15 |
| 2.6   | 0        | 0.71     | 0.000030 | 0.17 |
| 2.8   | 0        | 0.67     | 0.000013 | 0.23 |

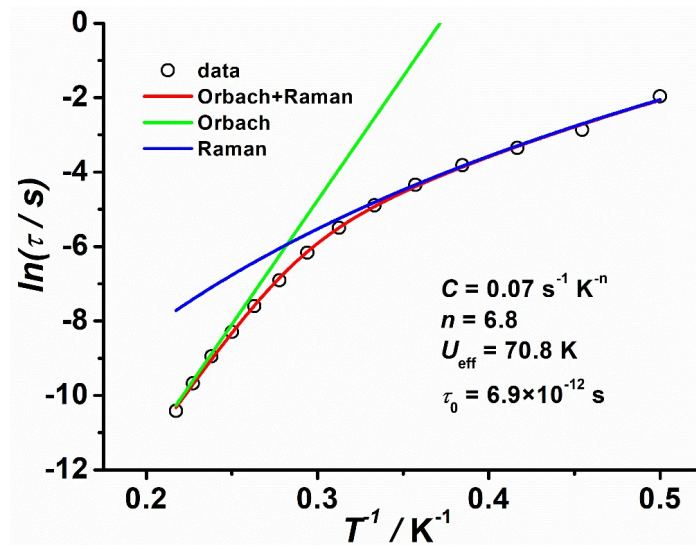

**Figure S15.** Relaxation time of the magnetization  $\ln(\tau)$  vs  $T^{-1}$  plot under the 1000 Oe applied field for **1**. The red line is the best fit to the relaxation time by the combination of Orbach and Raman processes. The blue and blue lines are representations for the Orbach and Raman processes, respectively.
